# Supplementary material for: Multi-scale pathology image texture signature is a prognostic factor for resectable lung adenocarcinoma: a multi-center, retrospective study
Source: Springer Nature journal article supplement (doi:10.1186/s12967-022-03777-x), 2022-12-14
Supplement: MOESM1 [file 23826366]

**Supplementary Information for**  
*Multi-scale pathology image texture signature is a prognostic factor for resectable lung adenocarcinoma: A multi-center, retrospective study*

This file includes:

- 1. Inclusion and exclusion criteria**
- 2. Feature definition**
- 3. Supplementary figures**
- 4. Supplementary tables**

## **1. Inclusion and exclusion criteria**

### **Inclusion criteria**

- (1) Patients who underwent surgery for lung adenocarcinoma with curative intent;
- (2) Patients whose overall survival (OS) information was complete and available;
- (3) AJCC TNM stage I–III;
- (4) Follow-up registered;
- (5) Age  $\geq$  18 years.

### **Exclusion criteria**

- (1) Patients with a history of previous pulmonary surgery, preoperative neoadjuvant therapy, or other malignancies;
- (2) Surgical margins with residual tumor;
- (3) Patients whose OS was less than 1 month;
- (4) Missing hematoxylin and eosin (H&E)-stained whole-slide images (WSIs);
- (5) The quality control of H&E-stained WSIs: excluding blurry, artifacts, poor staining, and insufficient tumor tissue.

## 2. Feature definition

### Group 1: First-order statistics

First-order statistics included minimum, maximum, mean, median, range, 10<sup>th</sup> percentile, 90<sup>th</sup> percentile, interquartile range, energy, entropy, uniformity, skewness, kurtosis, variance, standard deviation, root mean squared (RMS), mean absolute deviation (MAD).

### Group 2: Grey level co-occurrence matrix (GLCM)

Contrast

$$Contrast = \sum_i \sum_j (i - j)^2 P(i, j)$$

Dissimilarity

$$Dissimilarity = \sum_{i,j} |i - j| P(i, j)$$

Homogeneity

$$Homogeneity = \sum_{i,j} \frac{P(i, j)}{1 + |i - j|}$$

Energy

$$Energy = \sqrt{\sum_{i,j} P(i, j)^2}$$

Correlation

$$Correlation = \sum_{i,j} \frac{(i - \mu_i)(j - \mu_j)P(i, j)}{\sigma_i \sigma_j}$$

Angular Second Moment (ASM)

$$ASM = \sum_{i,j} P(i, j)^2$$

Standard Deviation

$$Std = std(P(i, j))$$

where  $P(i, j)$  represented the gray level co-occurrence matrix.

### Group 3: Gray level run length matrix (GLRLM)

Short Run Emphasis (SRE)

$$SRE = \frac{\sum_{i,j} \frac{P(i, j|\theta)}{j^2}}{\sum_{i,j} P(i, j|\theta)}$$

Long Run Emphasis (LRE)

$$LRE = \frac{\sum_{i,j} j^2 P(i, j|\theta)}{\sum_{i,j} P(i, j|\theta)}$$

Gray Level Non-Uniformity (GLN)

$$GLN = \frac{\sum_i [\sum_j P(i, j|\theta)]^2}{\sum_{i,j} P(i, j|\theta)}$$

Run Level Non-Uniformity (RLN)

$$RLN = \frac{\sum_j [\sum_i P(i, j | \theta)]^2}{\sum_{i, j} P(i, j | \theta)}$$

Run Percentage (RP)

$$RP = \sum_{i, j} \frac{P(i, j | \theta)}{N_p}$$

Low Gray Level Run Emphasis (LGLRE)

$$LGLRE = \frac{\sum_{i, j} \frac{P(i, j | \theta)}{i^2}}{\sum_{i, j} P(i, j | \theta)}$$

High Gray Level Run Emphasis (HGLRE)

$$HGLRE = \frac{\sum_{i, j} i^2 P(i, j | \theta)}{\sum_{i, j} P(i, j | \theta)}$$

Short Run Low Gray Level Emphasis (SRLGLE)

$$SRLGLE = \frac{\sum_{i, j} \frac{P(i, j | \theta)}{i^2 j^2}}{\sum_{i, j} P(i, j | \theta)}$$

Short Run High Gray Level Emphasis (SRHGLE)

$$SRHGLE = \frac{\sum_{i, j} \frac{i^2 P(i, j | \theta)}{j^2}}{\sum_{i, j} P(i, j | \theta)}$$

Long Run Low Gray Level Emphasis (LRLGLE)

$$LRLGLE = \frac{\sum_{i, j} \frac{j^2 P(i, j | \theta)}{i^2}}{\sum_{i, j} P(i, j | \theta)}$$

Long Run High Gray Level Emphasis (LRHGLE)

$$LRHGLE = \frac{\sum_{i, j} i^2 j^2 P(i, j | \theta)}{\sum_{i, j} P(i, j | \theta)}$$

where  $P(i, j | \theta)$  represented the gray level run length matrix. There were generally four calculation directions  $\theta$ , including 0-degree, 45-degree, 90-degree, and 135-degree.  $N_p$  denoted the number of elements in the matrix.

### 3. Supplementary figures

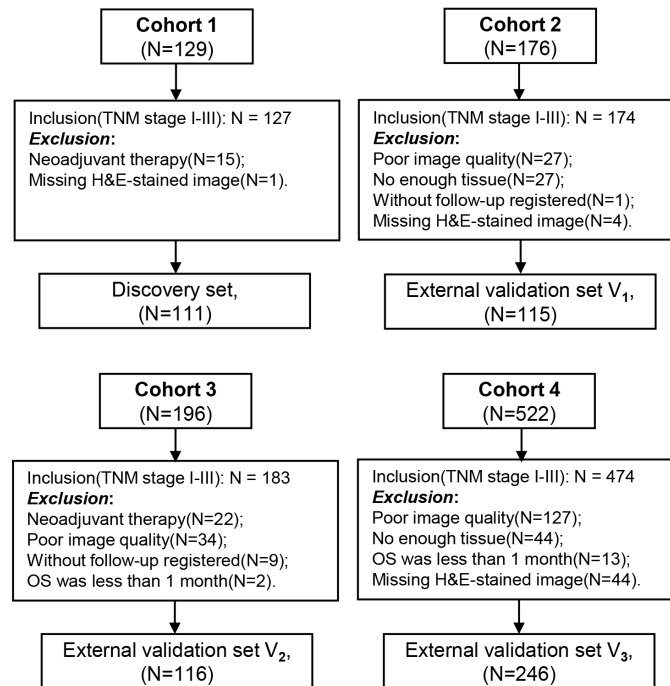

Figure S1. Data preparation and demographics of all cohorts.

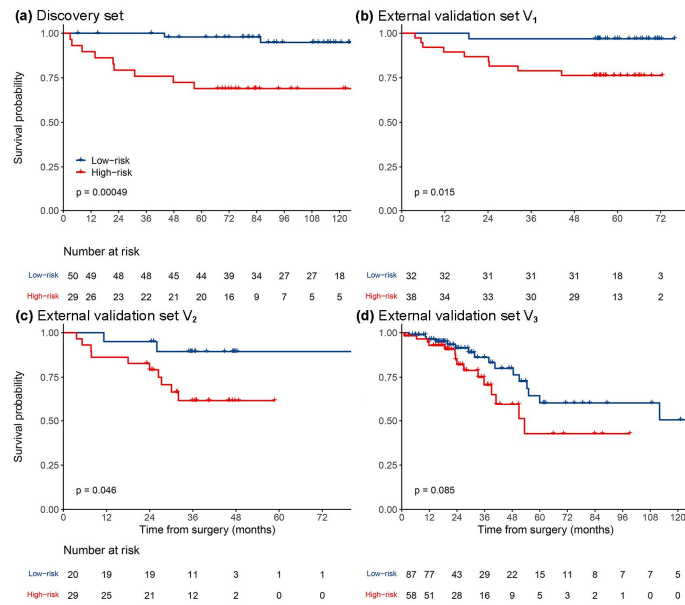

**Figure S2.** Kaplan–Meier curves of patients stratified by MPIS in the subgroup of patients with TNM stage I LUAD in the **(a)** discovery set; **(b)** external validation set V<sub>1</sub>; **(c)** external validation set V<sub>2</sub>; **(d)** external validation set V<sub>3</sub>.

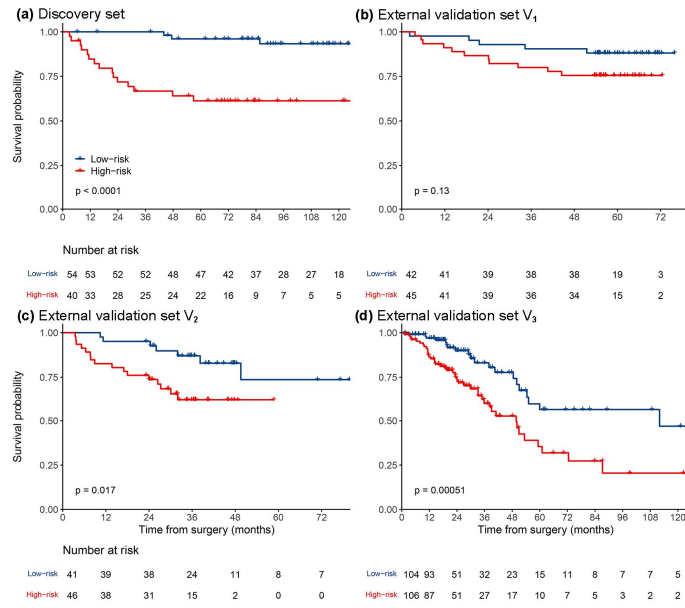

**Figure S3.** Kaplan–Meier curves of patients stratified by MPIS in the subgroup of patients with early-stage LUAD in the **(a)** discovery set; **(b)** external validation set V<sub>1</sub>; **(c)** external validation set V<sub>2</sub>; **(d)** external validation set V<sub>3</sub>.

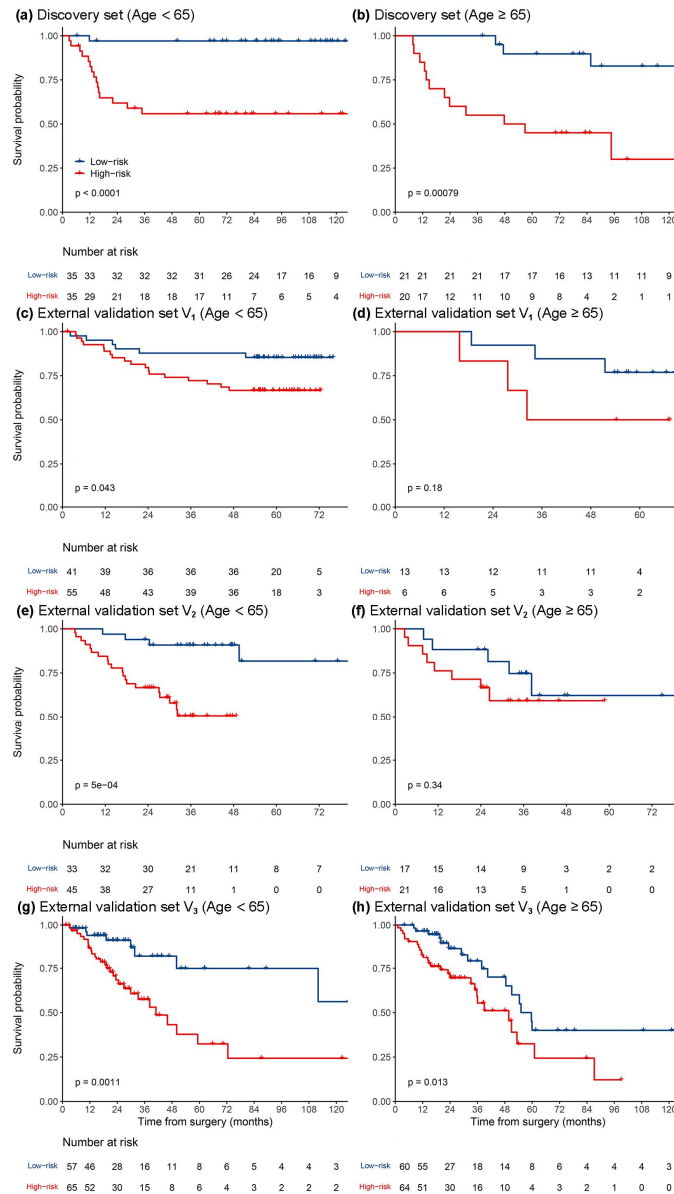

**Figure S4.** Kaplan–Meier curves of patients stratified by MPIS in the subgroups: **(a)** patients with age<65 years in the discovery set; **(b)** patients with age≥65 years in the discovery set; **(c)** patients with age<65 years in the external validation set V<sub>1</sub>; **(d)** patients with age≥65 years in the external validation set V<sub>1</sub>; **(e)** patients with age<65 years in the external validation set V<sub>2</sub>; **(f)** patients with age≥65 years in the external validation set V<sub>2</sub>; **(g)** patients with age<65 years in the external validation set V<sub>3</sub>; **(h)** patients with age≥65 years in the external validation set V<sub>3</sub>.



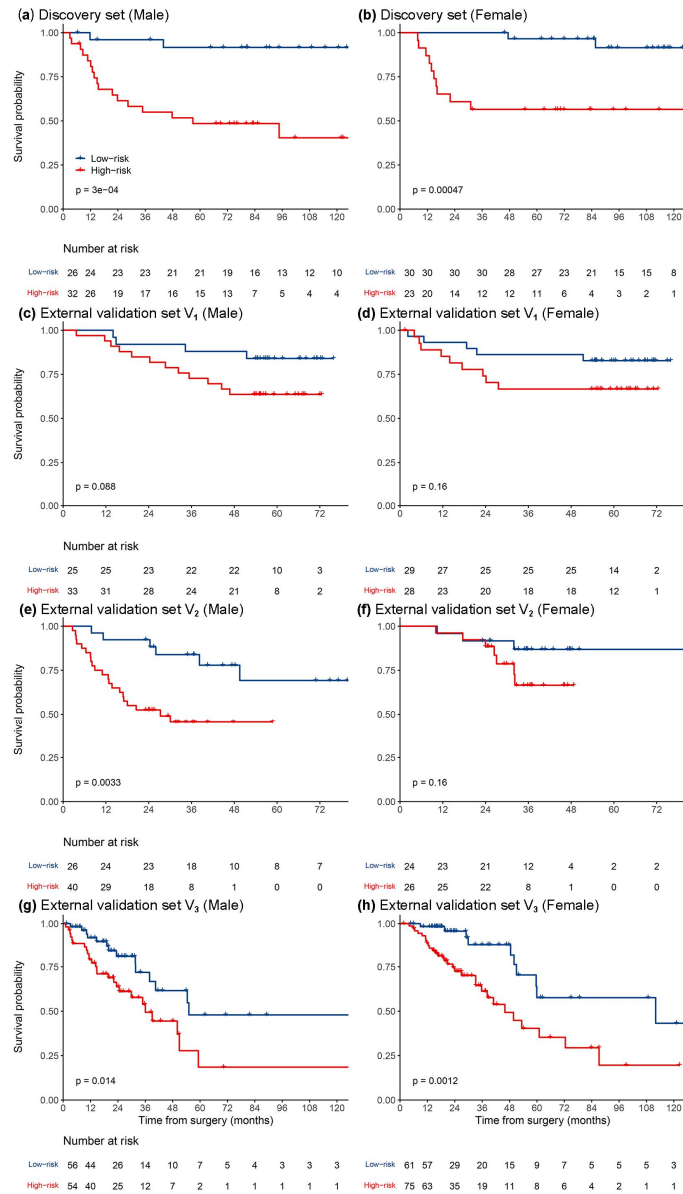

**Figure S5.** Kaplan–Meier curves of patients stratified by MPIS in the subgroups: **(a)** male sex in the discovery set; **(b)** female sex in the discovery set; **(c)** male sex in the external validation set V<sub>1</sub>; **(d)** female sex in the external validation set V<sub>1</sub>; **(e)** male sex in the external validation set V<sub>2</sub>; **(f)** female sex in the external validation set V<sub>2</sub>; **(g)** male sex in the external validation set V<sub>3</sub>; **(h)** female sex in the external validation set V<sub>3</sub>.

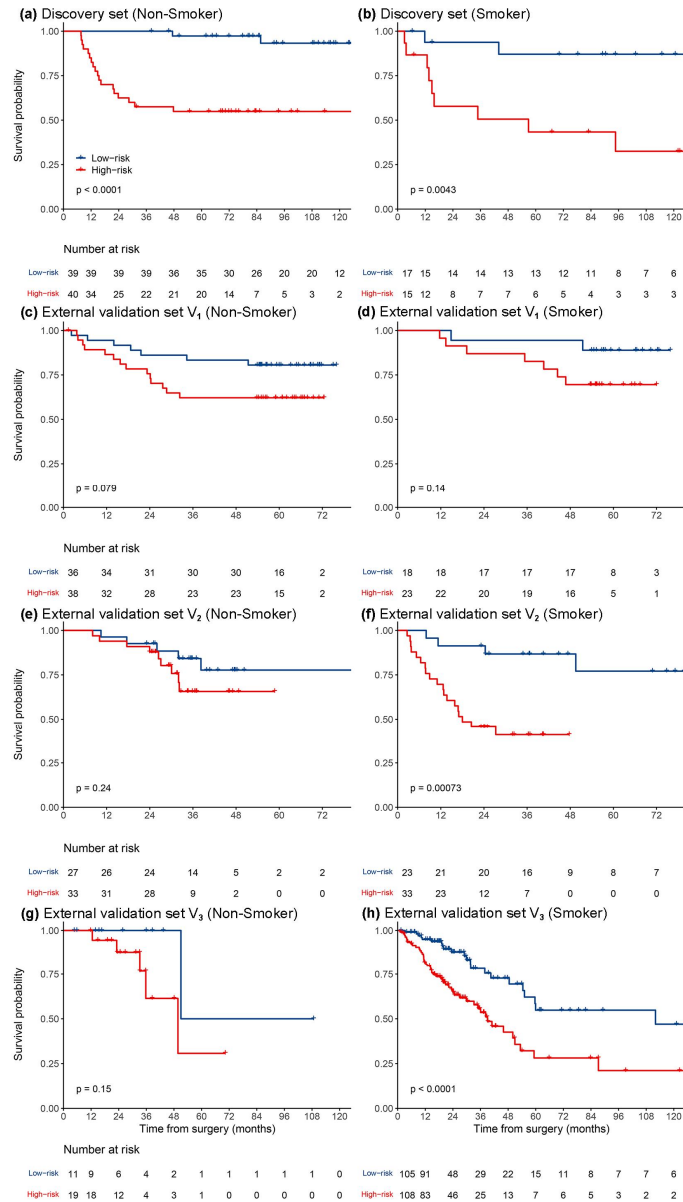

**Figure S6.** Kaplan–Meier curves of patients stratified by MPIS in the subgroups: **(a)** non-smoker in the discovery set; **(b)** smoker in the discovery set; **(c)** non-smoker in the external validation set V<sub>1</sub>; **(d)** smoker in the external validation set V<sub>1</sub>; **(e)** non-smoker in the external validation set V<sub>2</sub>; **(f)** smoker in the external validation set V<sub>2</sub>; **(g)** non-smoker in the external validation set V<sub>3</sub>; **(h)** smoker in the external validation set V<sub>3</sub>.

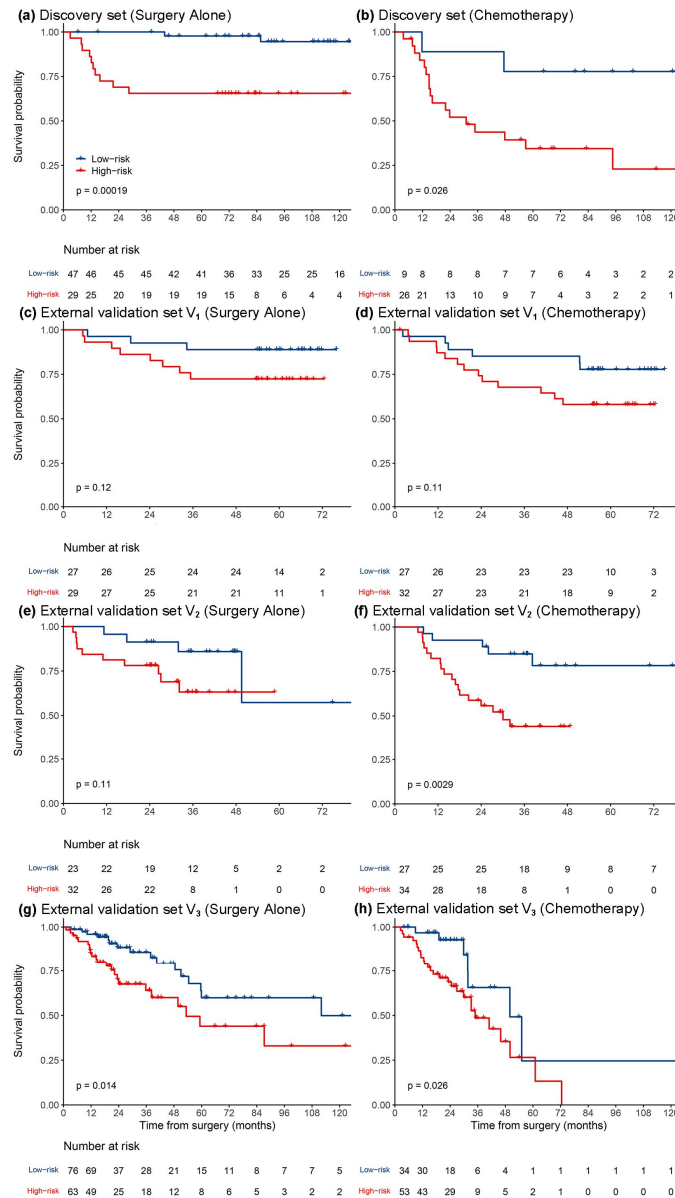

**Figure S7.** Kaplan–Meier curves of patients stratified by MPIS in the subgroups: **(a)** patients without adjuvant chemotherapy in the discovery set; **(b)** patients received adjuvant chemotherapy in the discovery set; **(c)** patients without adjuvant chemotherapy in the external validation set V<sub>1</sub>; **(d)** patients received adjuvant chemotherapy in the external validation set V<sub>1</sub>; **(e)** patients without adjuvant chemotherapy in the external validation set V<sub>2</sub>; **(f)** patients received adjuvant chemotherapy in the external validation set V<sub>2</sub>; **(g)** patients without adjuvant chemotherapy in the external validation set V<sub>3</sub>; **(h)** patients received adjuvant chemotherapy in the external validation set V<sub>3</sub>.

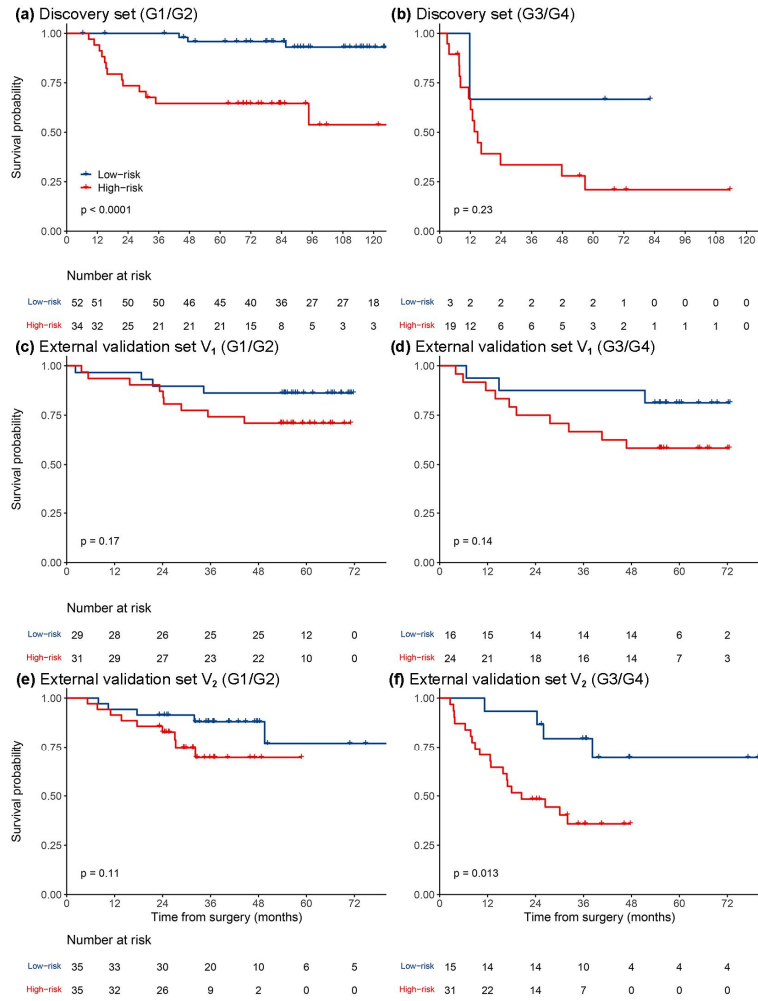

**Figure S8.** Kaplan–Meier curves of patients stratified by MPIS in the subgroups: **(a)** patients with well-moderately differentiated cancer in the discovery set; **(b)** patients with poorly-undifferentiated cancer in the discovery set; **(c)** patients with well-moderately differentiated cancer in the external validation set  $V_1$ ; **(d)** patients with poorly-undifferentiated cancer in the external validation set  $V_1$ ; **(e)** patients with well-moderately differentiated cancer in the external validation set  $V_2$ ; **(f)** patients with poorly-undifferentiated cancer in the external validation set  $V_2$ .

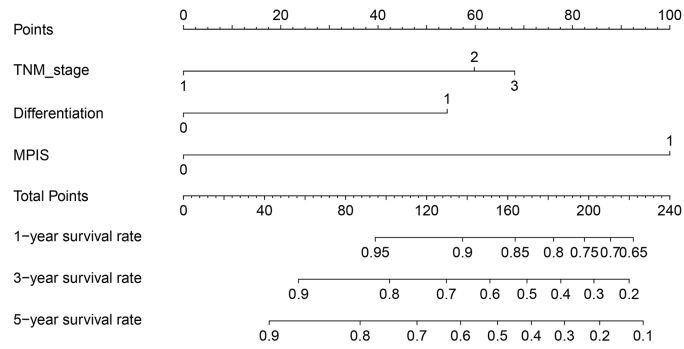

(a) Full Model

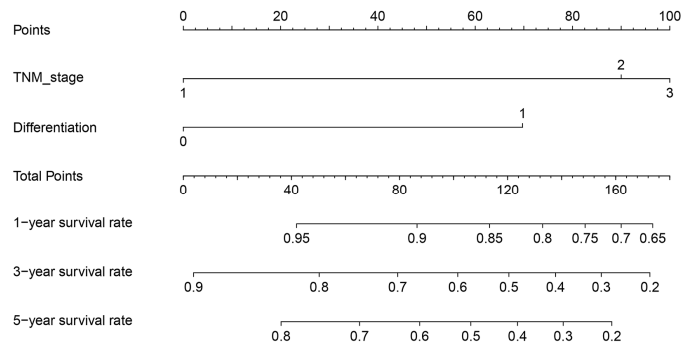

(b) Clinical Model

**Figure S9.** The visualization of the full model (a) and clinical model (b) as nomograms for patients with resectable LUAD.

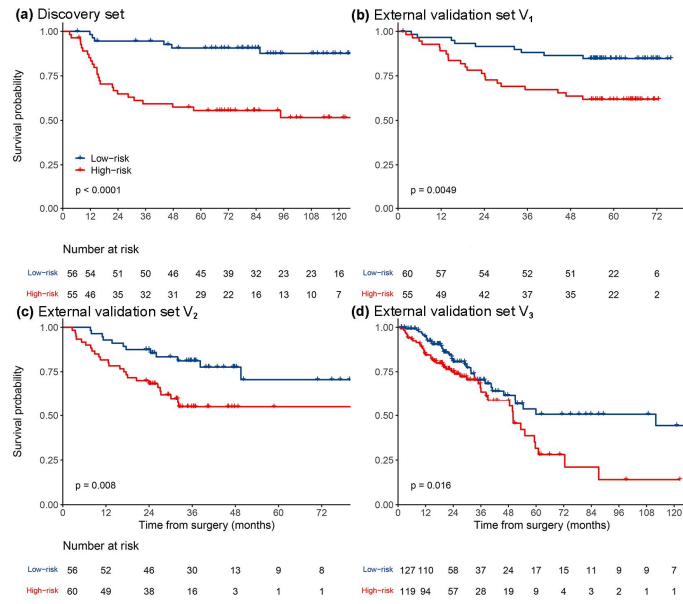

**Figure S10.** Kaplan–Meier curves of patients stratified by single-scale pathology image signature at 2.5× magnification in the (a) discovery set, (b) external validation set V<sub>1</sub>, (c) external validation set V<sub>2</sub>, and (d) external validation set V<sub>3</sub>.

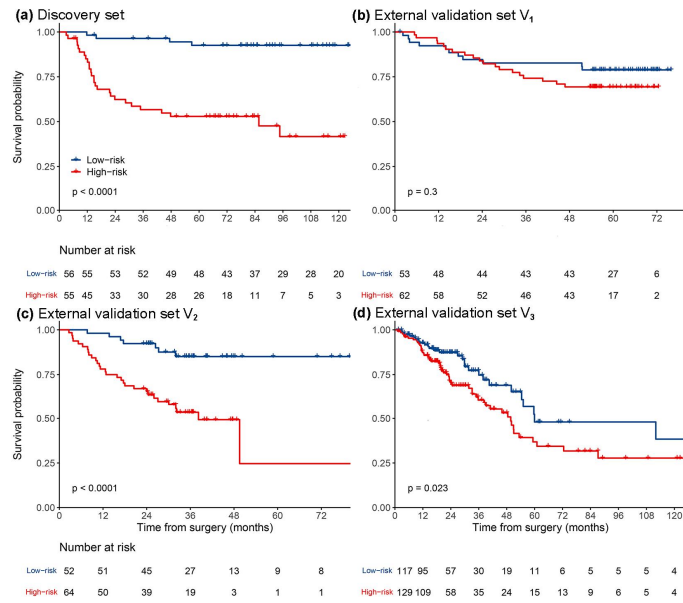

**Figure S11.** Kaplan–Meier curves of patients stratified by single-scale pathology image signature at 10× magnification in the (a) discovery set, (b) external validation set V<sub>1</sub>, (c) external validation set V<sub>2</sub>, and (d) external validation set V<sub>3</sub>.

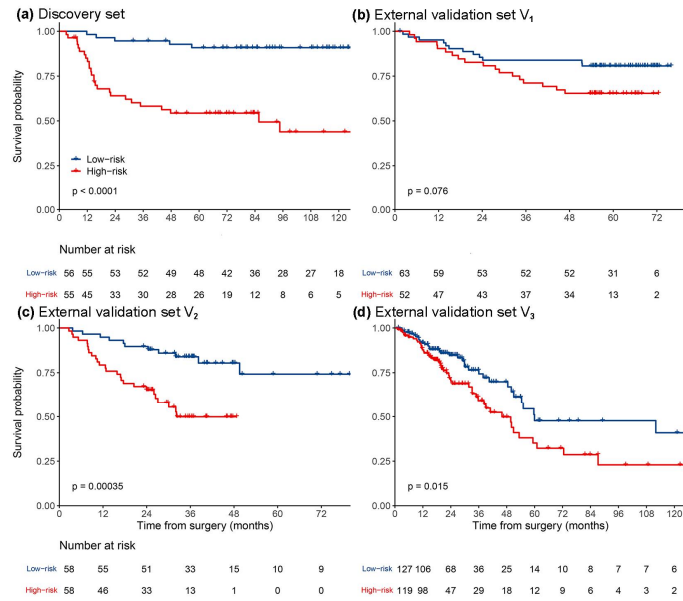

**Figure S12.** Kaplan–Meier curves of patients stratified by single-scale pathology image signature at 40× magnification in the (a) discovery set, (b) external validation set V<sub>1</sub>, (c) external validation set V<sub>2</sub>, and (d) external validation set V<sub>3</sub>.



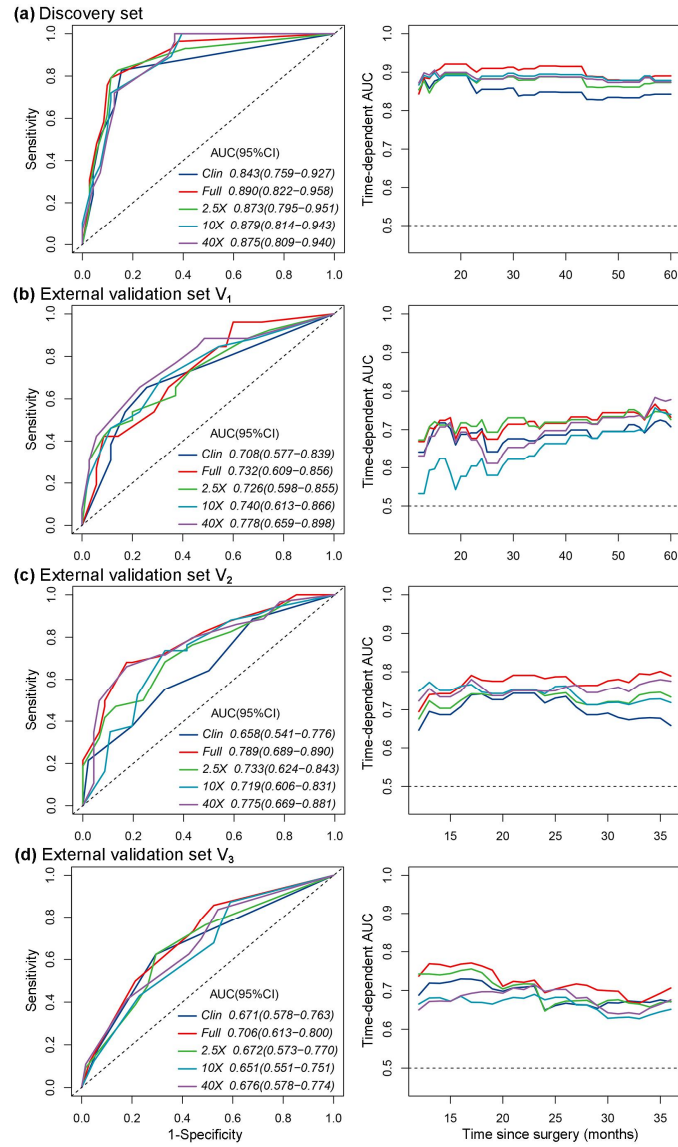

**Figure S13.** Time-dependent ROC curves and AUC curves of models in the (a) discovery set, (b) external validation set  $V_1$ , (c) external validation set  $V_2$ , and (d) external validation set  $V_3$ . Time-dependent ROC curves are evaluated for 5-year OS (or for 3-year OS), and time-dependent AUC curves are plotted for 12 to 60 months (or 12 to 36 months).

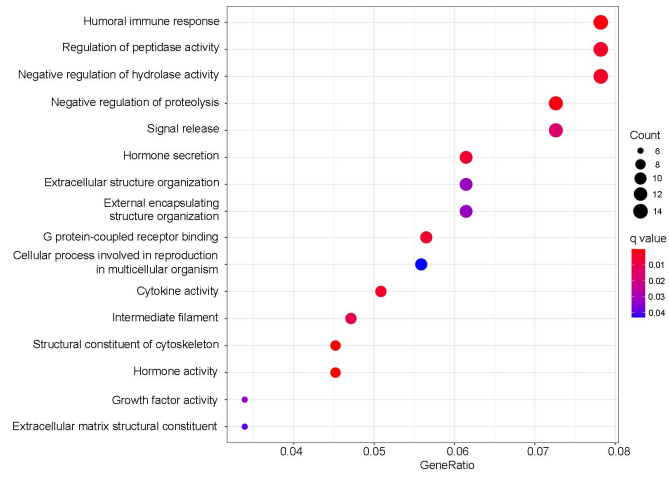

**Figure S14.** Significantly enriched biological pathways in Gene Ontology (GO) enrichment analysis.

#### 4. Supplementary tables

**Table S1.** The specific definitions of the selected texture features.

| Feature                | Magnification | Definition                                                                        |
|------------------------|---------------|-----------------------------------------------------------------------------------|
| glrlm_SRLGLE_90_2.5    | 2.5×          | The short run low gray level emphasis (SRLGLE) of GLRLM in a 90-degree direction. |
| glrlm_SRLGLE_90_40     | 40×           | The short run low gray level emphasis (SRLGLE) of GLRLM in a 90-degree direction. |
| glcm_dissimilarity_2.5 | 2.5×          | Dissimilarity of GLCM.                                                            |
| Kurtosis_10            | 10×           | Kurtosis of the grayscale values.                                                 |
| glrlm_LRHGLE_90_2.5    | 2.5×          | The long run high gray level emphasis (LRHGLE) of GLRLM in a 90-degree direction. |
| glrlm_SRE_0_40         | 40×           | The short run emphasis (SRE) of GLRLM in a 90-degree direction.                   |
| glcm_ASM_2.5           | 2.5×          | Angular second moment (ASM) of GLCM.                                              |
| Percentile_10th_40     | 40×           | The 10th percentile of the grayscale values.                                      |

Abbreviations: GLRLM, gray level run length matrix; GLCM, grey level co-occurrence matrix.

**Table S2.** The LASSO Cox selected features and corresponding coefficients to construct the MPIS.

| Feature                | Coefficient  |
|------------------------|--------------|
| glrlm_SRLGLE_90_2.5    | -0.420951292 |
| glrlm_SRLGLE_90_40     | -0.604133682 |
| glcm_dissimilarity_2.5 | -0.305400033 |
| Kurtosis_10            | -0.385107632 |
| glrlm_LRHGLE_90_2.5    | 0.522071813  |
| glrlm_SRE_0_40         | -0.01502991  |
| glcm_ASM_2.5           | 0.275726346  |
| Percentile_10th_40     | 0.538150006  |

Abbreviations: LASSO, least absolute shrinkage selection operator.

**Table S3.** The LASSO Cox selected features and corresponding coefficients to construct the single-scale pathology image signature at 2.5× magnification.

| <i>2.5× magnification</i> |                    |
|---------------------------|--------------------|
| <b>Feature</b>            | <b>Coefficient</b> |
| glcm_dissimilarity        | -0.489443909       |
| glrlm_LRHGLE_0            | 0.839081469        |
| glrlm_RP_90               | 0.059384676        |
| glrlm_SRLGLE_90           | -0.416953234       |

Abbreviations: LASSO, least absolute shrinkage selection operator.

**Table S4.** The LASSO Cox selected features and corresponding coefficients to construct the single-scale pathology image signature at 10× magnification.

| <i>10× magnification</i> |                    |
|--------------------------|--------------------|
| <b>Feature</b>           | <b>Coefficient</b> |
| glcm_correlation         | 0.023625325        |
| glrlm_SRLGLE_0           | -0.730282591       |
| percentile_10th          | 0.30181533         |
| glrlm_RLN_135            | 0.501821261        |
| Variance                 | 0.051113712        |
| glrlm_RLN_45             | 0.384302891        |

Abbreviations: LASSO, least absolute shrinkage selection operator.

**Table S5.** The LASSO Cox selected features and corresponding coefficients to construct the single-scale pathology image signature at 40× magnification.

| <i>40× magnification</i> |                    |
|--------------------------|--------------------|
| <b>Feature</b>           | <b>Coefficient</b> |
| glrlm_LGLRE_0            | -2.185308282       |
| glrlm_SRE_0              | 0.269478825        |
| percentile_10th          | 0.442351347        |
| Kurtosis                 | -0.511713491       |
| Maximum                  | 0.569001482        |
| glrlm_SRLGLE_90          | 1.905184662        |

Abbreviations: LASSO, least absolute shrinkage selection operator.
